# Supplementary material for: High-Density Lipoprotein Binds toMycobacterium aviumand Affects the Infection of THP-1 Macrophages
Source: Hindawi journal article supplement (doi:10.1155/2016/4353620), 2016-01-01

Supplementary Figure 1. MS analysis for apoA-I binding lipid. The lipid obtained from the TLC blot was mixed with a matrix solution: 2,5-dihydroxy benzoic acid (Sigma-Aldrich) in 50% acetonitrile containing 0.1% trifluoroacetic acid. MALDI-TOF MS spectra were obtained using the reflectron and positive ion mode using ultrafleXtreme TOF/TOF instrument (Bruker).

Supplemental Figure 1

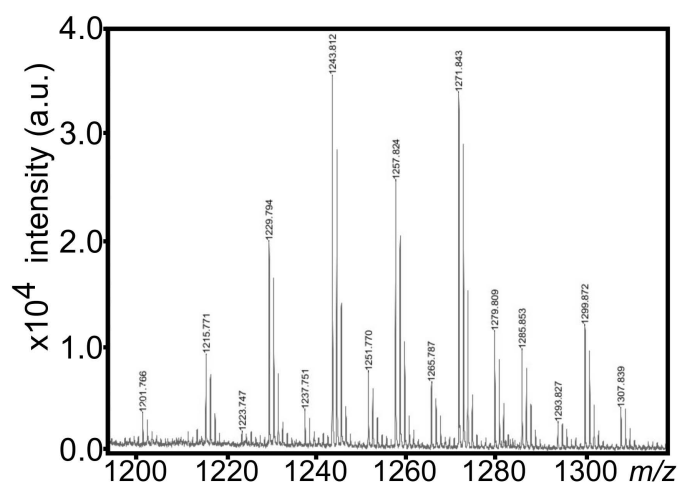

Supplement: f1 [file 4353620.f1.pdf]
